# Supplementary material
Source: publisher figshare collection journal article supplement (https://acs.figshare.com/ndownloader/files/5219095)
Supplement: Supplementary file 1 [file 5219095]

# Synthesis of Oligomers Derived from Amide- Linked Neuraminic Acid Analogs<sup>#</sup>

*Travis Q. Gregar<sup>¶,†</sup> and Jacquelyn Gervay-Hague<sup>§\*</sup>*

<sup>¶</sup>Department of Chemistry, The University of Arizona, Tucson, AZ 85721

<sup>§</sup>Department of Chemistry, University of California, Davis, One Shields Ave.,

Davis, CA 95616

Gervay@chem.ucdavis.edu

**RECEIVED DATE (to be automatically inserted after your manuscript is accepted  
if required according to the journal that you are submitting your paper to)**

Synthesis of Oligomers Derived from

CORRESPONDING AUTHOR:

Jacquelyn Gervay-Hague

Department of Chemistry

UC, Davis

One Shields Ave.

Davis, CA 95616

530-754-9577

E-mail: gervay@Chem.ucdavis.edu

**Supplementary information:**

**General Experimental Procedures:** All materials obtained from commercial sources were used as is unless otherwise noted. All reactions were performed in flame-dried glassware. Solvents were distilled prior to use per literature procedures.<sup>i</sup> <sup>1</sup>H NMR spectra were collected on 500 MHz or 600 MHz NMR spectrometers. Abbreviations used for <sup>1</sup>H NMR interpretation: s: singlet, d: doublet, t: triplet, at: apparent triplet, dd: doublet of doublets, dt: doublet of triplets, q: quartet, m: multiplet.

---

<sup>i</sup> Perrin, D.D.; Armarego, W.L.F.; Perrin, D.R. Purification of Laboratory Chemicals Pergamon Press, New York, 1980.
